# Supplementary material
Source: PubMed Central journal article supplement (PMC3135805)
Supplement: mmc1.pdf [file mmc1.pdf]

## **Disruption of *PTPRO* Causes Childhood-Onset**

### **Nephrotic Syndrome**

**Fatih Ozaltin, Tulin Ibsirlioglu, Ekim Z. Taskiran, Dilek Ertoy Baydar, Figen Kaymaz, Mithat Buyukcelik, Beltinge Demircioglu Kilic, Ayse Balat, Paraskevas Iatropoulos, Esin Asan, Nurten A. Akarsu, Franz Schaefer, Engin Yilmaz, Ayşin Bakkaloglu, and the PodoNet Consortium**

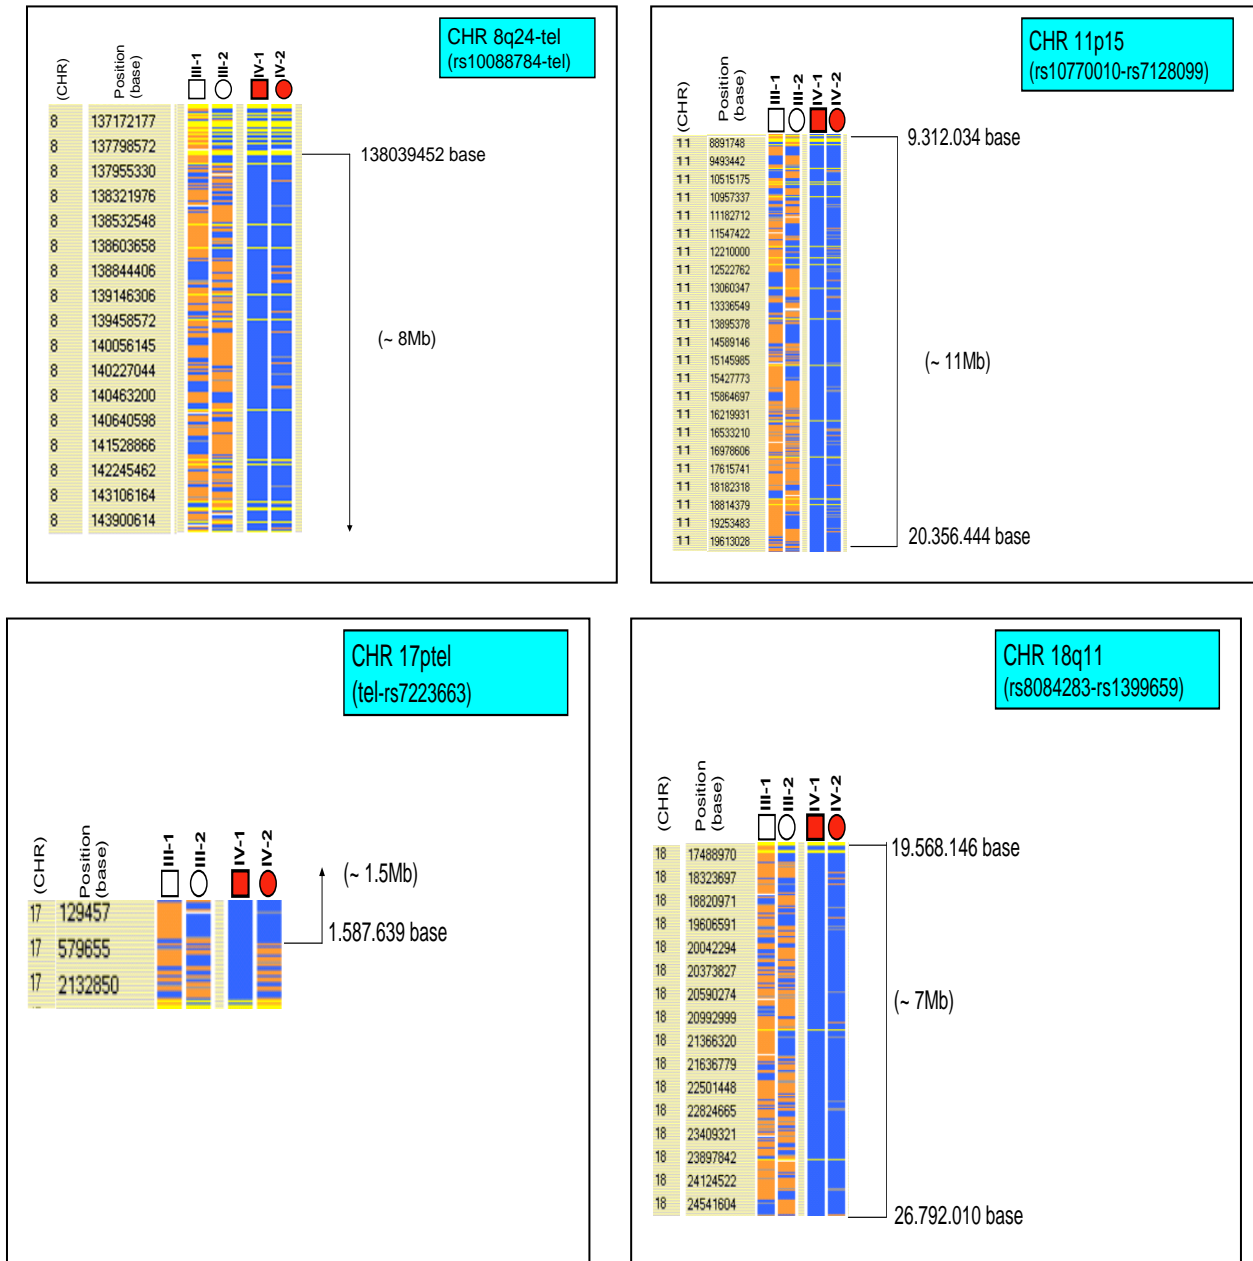

**Figure S1.** Critical Regions of Homozygosity Obtained via 250K SNP Analysis in Family A

In all, 5 large homozygous segments on chromosome 12p12, 8qtel, 11p15, 17ptel, and 18q11 regions were observed in the genome-wide analysis of family A. Details of the chromosome 12p12 region are presented in the text (Figure 1a-b) and the remaining 4 localizations are included in this supplemental figure. SNP numbers (i.e. rs10770010 and rs7128099) located in the proximal and distal boundaries of each critical region are shown upper right.

Ex1 Ex2  
1 MGHLPTGIHGARRLLPLLWLFVLFKNATAFHVTVQDDNNIVVSLEASDVI 50  
51 SPASVYVVKITGESKNYFFEFEEFNSTLPPPVIKASYHGLYYIITLVVV 100  
Ex3  
101 NGNVVTKPSRSITVLTKPLPVTSVSIYDYKPSPETGVLFEIHYPEKYNVF 150  
Ex4  
151 TRVNISYWEGKDFRTMLYKDFFKGKTVFNHWLPGMCYSNITFQLVSEATF 200  
Ex5  
201 NKSTLVEYSGV SHEPKQHRTAPYPPQNISVRIVNLNKNWEEQSGNFPEE 250  
251 SFMRSQDTIGKEKLFHFTEETPEIPSGNISSGWPDFNSSDYETTSQPYWW 300  
301 DSASAAPESEDEFVSVLPMEYENNSTLSETEKSTSGSFSFFPVQMILTWL 350  
Ex6  
351 PPKPPTAFDGFHIIHEREENFTEYLMVDEEAHEFVAELKEPGKYKLSVT 400  
Ex7  
401 FSSSGSCETRKSQSAKSLSFYISPSGEWIEELTEKPQHVSVHVLSTTAL 450  
Ex8  
451 MSWTSSQENYNSTIVSVSLTCQKQKESQRLEKQYCTQVNSSKPIIENLV 500  
Ex9  
501 PGAQYQVV IYLRKGPLIGPPSDPVTFAIVPTGIKDLMLYPLGPTAVVLSW 550  
Ex10  
551 TRPYLGVFRKYVEMFYFNPATMTSEWTTYEIAATVSLTASVRIANLLP 600  
Ex11  
601 AWYYNFRV TMVTWGDPELSCCDSSTISFITAPVAPEITSVEYFNLLYIS 650  
Ex12  
651 WTYGDDTTDLSHSRMLHWMVVAEGKKIKKSVTRNVMTAILSLPPGDIYN 700  
Ex13  
701 LSV TACTERGSNTSMLRLVKLE PAPPKSLFAVNKTQTSVTLWVEEGVAD 750  
Ex14  
751 FFEVFCQQVGSSQKTKLQEPVAVSSHVVTISSLLPATAYNCSVTSFSHDS 800

801 PSVPTFIAVSTMVTEMNPNVVV **ISVLAAILSTLLIGLLLVTLII** LRKKHLQ 850

851 MAR **ECGAGTFVNFASLERDGLPYN** WSKNGLKKRKLTN **PVQLDDFDAYIK** 900

901 **DMAKDSYKFSLQFE** ELKLIIGLDIPHFAADLPLNRCKNRYTNILPYDFSR 950

951 VRLVSMNEEEGADYINANYIPGYNSPQEYIATQGPLPETRNDFWKMVLQQ 1000

1001 **KSQIIVMLTQCNEKRRVKCDHYWPFTEEPIAYGDITVEMISEEEQDDWAC** 1050

1051 RHFRIINYADEMQDVMHFNNTAWPDHGVPTANAAESILQFVHMVRQQATKS 1100

1101 **KGPMIIHCSAGVGR** TGTFFIALDRLLQHIRDHEFVDILGLVSEMRSYRMSM 1150

1151 **VQTEEQYIFIHQCVQLMWMKKKQQFCISDVIYENVSKS**

**Figure S2.** Protein Domains of Human PTPRO

Protein domains of human PTPRO (Q16827) transcript variant 2 (NM\_002848.2), as predicted using UniProt (<http://www.uniprot.org/blast/?about=Q16827|876-903>). Note that exon 17 is lacking variant 2 (see text).

The extent of putative domains is highlighted as follows: yellow: **signal peptide**; light blue: **fibronectin type-III domain**; green: **transmembrane domain**; pink: **substrate-binding region**; gray: **tyrosine protein phosphatase domain**.

Skipping exons related to splice donor mutations described herein are shown as red.

Encoding exons are shown at their start positions.

**Signal peptide**

|                |                                                                 |    |
|----------------|-----------------------------------------------------------------|----|
| H._sapiens     | MGHLPTGIHGARRLLPLLWLVFLVLFKNAFAFHVTVQDDNNIVVSLLEASDVISPASVYVVKI | 60 |
| P._troglodytes | MGHLPTGIHGARRLLPLLWLVFLVLFKNAFAFHVTVQDDNNIVVSLLEASDVISPASVYVVKI | 60 |
| C._familiaris  | -----LQNAATTFHVTVQDDNNIVVSLLEASDVMSPPSSVYVVKI                   | 38 |
| M._musculus    | MGHLPRGTLGGRLLPLLGLFVLLKIVTTFHVAVQDDNNIVVSLLEASDIVSPASVYVVRV    | 60 |
| R._norvegicus  | MGHLPRERRGGRLLPLLGLFVLLKIVSTFHVTVRDDNNIVVSLLEASDVVSPASVYVVRV    | 60 |
| X._tropicalis  | -----                                                           |    |
| D._rerio       | -----MSSARARFFFIFIFIQSAAGFRVQLQDGVRLMSLDDGDIGPVGSEYAVRV         | 52 |
| F._rubripes    | -----LTALPVPVQVSWAFRAWVNEDGRIMAALHESDLQENATAYAAQL               | 44 |

**Fibronectin Type-3**

|                |                                                              |     |
|----------------|--------------------------------------------------------------|-----|
| H._sapiens     | TGE--SKNYFFEFEEFNSTLPPPVIFKASYHGLYIIITLVVVNGNVVTKPSRSITVLTKE | 118 |
| P._troglodytes | TGE--SKNYFFEFEEFNSTLPPPVIFKASYHGLYIIITLVVVNGNVVTKPSRSITVLTKE | 118 |
| C._familiaris  | TGE--SKNYFFEFEEFNSTLPPPVTFKANYHGLYIIITLVVVNGNVVTKPSRSITVLTKE | 96  |
| M._musculus    | AGE--SKNYFFEFEEFNSTLPPPVVFKATYHGLYIIITLVVVNGNVVTKPSRSITVLTKE | 118 |
| R._norvegicus  | AGE--SKNYFFEFEEFNSTLPPPVVFKATYHGLYIIITLVVVSGNVVTKPSRSITVLTKE | 118 |
| X._tropicalis  | -----                                                        |     |
| D._rerio       | SGEPLTHTLLFQQADAHTLPEPLLFNASYHGLLISLMTDG----RTHTTTSITIQP     | 107 |
| F._rubripes    | SGDAQTTVALFAN-----VSKALSFNTSHHGLCYSGLLIKVGHWTWSPVSSVPLTKE    | 98  |

**Fibronectin Type-3**

|                |                                                                |     |
|----------------|----------------------------------------------------------------|-----|
| H._sapiens     | LPVTSVSIYDYKPSPETGVLFEEIHYPEKYNVFTRVNISYEWEGKDFRTMLYKDFFKGKTVF | 178 |
| P._troglodytes | LPVTSVSIYDYKPSPETGVLFEEIHYPEKYNVFTRVNISYEWEGKDFRTMLYKDFFKGKTVF | 178 |
| C._familiaris  | LPVTSVSIYDYKPSPETGVLFEEIHYPEKYNVFTRVNISYEWEGKDFRTMLYKDFFKGKTVF | 156 |
| M._musculus    | LPVTSVSIYDYKPSPETGVLFEEIHYPEKYNVFSRVNISYEWGRDFRTMLYKDFFKGKTVF  | 178 |
| R._norvegicus  | LPVTSVSIYDYKPSPETGVLFEEIHYPEKYNVFSRVNISYEWEGKDFRTMLYKDFLKGKTVF | 178 |
| X._tropicalis  | -----                                                          |     |
| D._rerio       | LPLDSVEMWDYAPSPETAVVFQIRSPDR-NIFTRVNISYTEGHQRRYMLYKDFLHGKTVF   | 166 |
| F._rubripes    | LPVHSAHILDYKESPETGVVFDIEPPAG-TIFSRVNITFTEGEESSMLYKDFYQGRKTVF   | 157 |

|                |                                                               |     |
|----------------|---------------------------------------------------------------|-----|
| H._sapiens     | NHWLPGMCYSNITFQLVSEATFNKSTLVEYSGVSHPEKQHRRTAPYPPQNISVRIVNLN-- | 236 |
| P._troglodytes | NHWLPGMCYSNITFQLVSEATFNKSTLVEYSGVSHKPKQHRRTAPYPPQNISVRIVNLN-- | 236 |
| C._familiaris  | NHWLPGICYSNITFQLVSEATFNKSTLVEYSGISHPEKQHRRTAPYPPRNISVRIVNLN-- | 214 |
| M._musculus    | NHWLPGLCYSNITFQLVSEATFNKSTLVEYSGVSHPEKQHRRTAPYPPRNISVRIVNLN-- | 236 |
| R._norvegicus  | NHWLPGICYSNITFQLVSEATFNKSTLVECSGVSHPEKQHRRTAPYPPRNISVRFVNLN-- | 236 |
| X._tropicalis  | -----                                                         |     |
| D._rerio       | KHWLPGVYSNITFQLISEASVNRSALLSRSDITHNPQQHRTVPPNPLNVSLKILHLSGR   | 226 |
| F._rubripes    | KHWLPGVCYRDITFQLVSEARVFRNSLVAHSDVTHKPLNHRTPVPPNLSHSIVHLS--    | 215 |

**Fibronectin Type-3**

|                |                                                             |     |
|----------------|-------------------------------------------------------------|-----|
| H._sapiens     | -----KNNWEEQSGNFPEESFMRS-QDTIGKEKLFHFTTEETPEIPSGNI          | 279 |
| P._troglodytes | -----KNNWEEQSGNFPEESFMRS-QDTIGKEKLFHFTTEETPEILSGNI          | 279 |
| C._familiaris  | -----KNNWEEQSGNFPEESFMRS-QDTVQKDKLFHFTDETPEIPSGNI           | 257 |
| M._musculus    | -----KNNWEEPSGSPFEDSFIKPPQDSIGRDRRFHFPETPEIPPSNV            | 280 |
| R._norvegicus  | -----KNNWEEPSGSPFEDSFIKIP-QDAIGRDRPFHFPETPEIPASNA           | 279 |
| X._tropicalis  | -----                                                       |     |
| D._rerio       | GPPGPVLTGAILKNSHNASVVRREDDLPEYEEQEPSTDLNTESNLTHTQLNQSESENES | 286 |
| F._rubripes    | -----QRVEQVSPESHEDSHTFPPQQSARRS-----                        | 242 |

|                |                                                            |     |
|----------------|------------------------------------------------------------|-----|
| H._sapiens     | SSG-----WPDFNSSDYETTSQPYWWSASAAPESEDE--FVSVLPMEYENNS--     | 325 |
| P._troglodytes | SSG-----WPDFNSSDYETTSQPYWWSASAAPESEDE--FVSVLPMEYENNS--     | 325 |
| C._familiaris  | SSG-----WPDFNSSDYETTSQPYWWSASATPESEDD--FVSVLPMEYENNS--     | 303 |
| M._musculus    | SSGSPSNVSSAWDPNSTDYESTSQPFWWSASAAPENED--FVSALPADYDTET--    | 335 |
| R._norvegicus  | SSG-----WPDFNGTEYESTSQPYWWSASAAPENED--FVSVLPADYDTEA--      | 325 |
| X._tropicalis  | -----                                                      |     |
| D._rerio       | ESE-----PVTAEP TLNSSTQSLWAWQTVSPAPTEEEEEGFVNALVPEYEDSNEPEG | 337 |
| F._rubripes    | -----                                                      |     |

**Fibronectin Type-3**

|                |                                                               |     |
|----------------|---------------------------------------------------------------|-----|
| H._sapiens     | -----TLSETEKSTSGSFSFFPVQMLTFLWLPKPPPTAFDGFHIIEREENFTEYLMVDEE  | 380 |
| P._troglodytes | -----TLSETEKSTSGSFSFFPVQMLTFLWLPKPPPTAFDGFHIIEREENFTEYLMVDEE  | 380 |
| C._familiaris  | -----TLSETEKSTAGSLSFPPVQMLNWLWLPKPPPTAFDGFHIIEREENFTEYLTVDEE  | 358 |
| M._musculus    | -----TLDRTEKPTADPFSAFPVQMTLSWLWLPKPPPTAFDGFNIIEREENFTDYLTVDDE | 390 |
| R._norvegicus  | -----TLGRTEKPTADPFSAFPVQMTLSWLWLPKPPPTAFDGFNIIEREENFTDYLTVDDE | 380 |
| X._tropicalis  | -----                                                         |     |
| D._rerio       | SALGIPLEPAVMPAVMPTPLAPVLLQLRWSPAPHTAYDAFNIIYIRNGNSTEATVDEN    | 397 |
| F._rubripes    | -----FGRRGTPQRPPELP-AKVPLNTGTSQRGTDAVNQT                      | 277 |

|                |                                                              |     |
|----------------|--------------------------------------------------------------|-----|
| H._sapiens     | AHEFVAELKEPGKYKLSVTFSSSGSCETRKSQSAKLSFYISPSGEWIEELTEKPOHVS   | 440 |
| P._troglodytes | AHEFVAELKEPGKYKLSVTFSSSGSCETRKSQSAKLSFYISPSGEWIEELTEKPOHVS   | 440 |
| C._familiaris  | AHEFVAELKEPGKYKLSVTFSSAGSCDTRKSQSAKLSFYISPLGEWIEELTEKPOHVS   | 418 |
| M._musculus    | AHEFVAELKEPGKYKLSVTFSSSGACETRKSQSAKLSFYISPTGEWIEELTEKPOHVS   | 450 |
| R._norvegicus  | AHEFVAELKEPGKYRLSVTFSSSGACETRKSQSAKLSFYISPTGEWIEELTEKPOHVS   | 440 |
| X._tropicalis  | -----                                                        |     |
| D._rerio       | THEFLAELSESGETYRIHVTFLLSAGDCEARESSANTAFYFYSPLSGEWMQPPERPQAVS | 457 |
| F._rubripes    | TRDNWADPTEP-----VLRDADEEFVN                                  | 299 |

**Fibronectin Type-3**

|                |                                                               |     |
|----------------|---------------------------------------------------------------|-----|
| H._sapiens     | VHVLSSTTALMSWTSSQENYNSTIVSVVSLTCQKQKESORLEKQYCTQVNSSKPIIENLV  | 500 |
| P._troglodytes | VHVLSSTTALMSWTSSQENYNSTIVSVVSLTCQKQKESORLEKQYCTQVNSSKPIIENLV  | 500 |
| C._familiaris  | VHVLSSTTALMSWTSSQENYNGTIVSVVSLTCQKQKESORLEKQYCTQVNSSKSIENLV   | 478 |
| M._musculus    | VHVLSSTTALMSWTSSQENYNSTIVSVVSLTCQKQKESORLEKQYCTQVNSSKPIIENLV  | 510 |
| R._norvegicus  | VHVLSSTTALLSWTSSQENYNSTIVSVVSLTCQKQKESORLEKQYCTQVNSSKPIIENLV  | 500 |
| X._tropicalis  | -----                                                         |     |
| D._rerio       | VKMLDSSSTAASVWAPSTHTYNGSLISVQSLTCLRPSISQRMELNYCSEENITSDIISSLT | 517 |
| F._rubripes    | AVVEDWASGGLGFIKLRQNRSLMPLLLPS-----QENSTSDIITRLT               | 344 |

**Fibronectin Type-3**

|                |                                                              |     |
|----------------|--------------------------------------------------------------|-----|
| H._sapiens     | PGAQYQVVVYLRKGPLIGPPSDPVTFAIVPTGKIDLMLYPLGPTAVVLSWTRPYLGVFRK | 560 |
| P._troglodytes | PGAQYQVVVYLRKGPLIGPPSDPVTFAI-----DLMLYPLGSTAVVLSWTRPYLGVFRK  | 554 |
| C._familiaris  | PGAQYQVVVYLRKGPLIGPPSDPVTFAIVPTGKIDLMLYPLGPTAVVLSWTRPYLGVFRK | 538 |
| M._musculus    | PGAQYQVVVYLRKGPLIGPPSDPVTFAIVPTGKIDLMLYPLGPTAVVLSWTRPYLGVFRK | 570 |
| R._norvegicus  | PGAQYQVVVYLRKGPLIGPPSDPVTFAIVPTGKIDLMLYPLGPTAVVLSWTRPYLGVFRK | 560 |
| X._tropicalis  | -----                                                        |     |
| D._rerio       | PGAQYRVVVYHTNGPLVSPASEPVIIDIEPTGVRDLVVYPLSPSAVILSWQRPYNVAFRK | 577 |
| F._rubripes    | PGAQYRVVVYHTNGPLISPPSEPVIIDIEPTGVHELAVYPLSPTAVILSWRRPYHVAFRK | 404 |

|                |                                                               |     |
|----------------|---------------------------------------------------------------|-----|
| H._sapiens     | YVVEFMFYFNPMATMTSEWTTYEIAATVSLTASVRIANLLPAWYVNFVMTVMTWGDPELSC | 620 |
| P._troglodytes | YVVEFMFYFNPMATMTSEWTTYEIAATVSLTASVRIANLLPAWYVNFVMTVMTWGDPELSC | 614 |
| C._familiaris  | YVVEFMFYFNPMATMTSEWTTYEIAATVSLTASVRIANLLPAWYVNFVMTVMTWGDPELSC | 598 |
| M._musculus    | YVVEFMFYFNPTTMTSEWTTYEIAATVSLTASVRIASLLPAWYVNFVMTVMTWGDPELSC  | 630 |
| R._norvegicus  | YVVEFMFYFNPTTMTSEWTTYEIAATVSLTSSVRIANLLPAWYVNFVMTVMTWGDPELSC  | 620 |
| X._tropicalis  | -----                                                         |     |
| D._rerio       | YVLQTFNNSATQTAQWSTYYEIAATASVIASVRVTDLLPAWFYVNFVMTVMTWGDPELSC  | 637 |
| F._rubripes    | YVLETFNPNVTLTSEWTTYEIAATESVIASVRVTDLLPAWYVNFVSMVMTWGEPELSC    | 464 |

**Fibronectin Type-3**

|                |                                                               |     |
|----------------|---------------------------------------------------------------|-----|
| H._sapiens     | CDSSTISFITAPVAPEITSVEYFNLSLLYISWTYGDGTTDLSHSRMLHWMVVAEGKK---- | 676 |
| P._troglodytes | CDSSTISFITAPVAPEITSVEYFNLSLLYISWTYGDGTTDLSHSRMLHWMVVAEGKK---- | 670 |
| C._familiaris  | CDSSTISFITAPVAPEITSVEYFNLSLLYISWTYGDGTTDLSHSRMLHWMVVAEGKK---- | 654 |
| M._musculus    | CDSSTISFITAPVAPEITSVEYFNLSLLYISWTYGDATTDLSHSRMLHWMVVAEGRR---- | 686 |
| R._norvegicus  | CDSSTISFITAPVAPEITSVEYFNLSLLYISWTYGDATTDLSHSRMLHWMVVAEGRR---- | 676 |
| X._tropicalis  | -----LTAPVAPQITSVEYSNGLLHITWAYGDGAFDLSHSRILHWQVIAEGKN----     | 48  |
| D._rerio       | CDTSTVSVFITAPEAPHISSVESHGVSFVFWTYGDLFTDLTHSRMLHWQVVAEGKKSARR  | 697 |
| F._rubripes    | CDSSAVSFVTAPEAPHISSVHYSRGLVFCWYTGVEFVVDLSHSRILHWQVLAIGKKGPE   | 524 |

:\*\*\* \*\*.\*:\*\*\*: . . .: \*\*\*: \*\*.\*:\*\*\* \*\*.\*:..



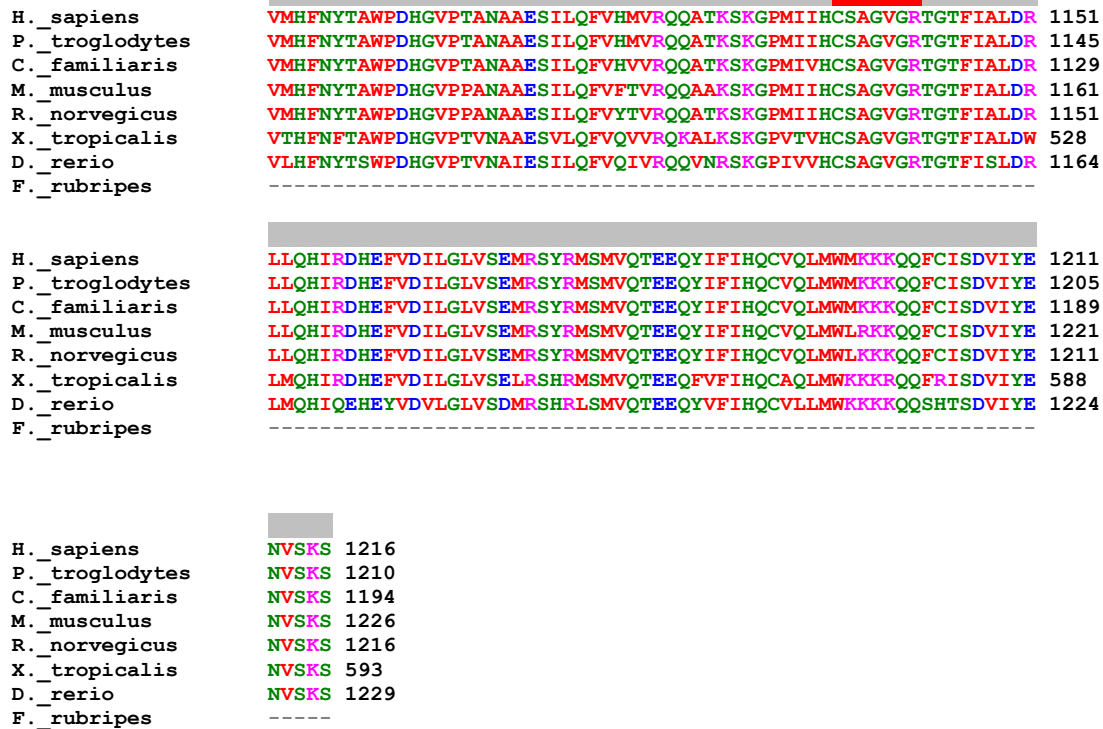

**Figure S3.** CLUSTAL v.2.0.12 Amino Acid Multiple Sequence Alignment of the Full Length of PTPRO throughout Evolution

Amino acid residues are given as single letter codes with the following color for residues: red: small hydrophobic or aromatic (AVFPMILWY); blue: acidic (DE); magenta: basic (RHK); green: hydroxyl, amine, basic, and glutamine (STYHCNGQ). The lowest row indicates conservation among the group of sequences. Periods indicate semi-conserved substitutions. Colons indicate conserved substitutions. Representations of putative protein domains predicted using UniProt are drawn above the sequence group, and are marked and color coded as follows: yellow: signal peptide; light blue: fibronectin type-III domain; green: transmembrane domain; gray: tyrosine protein phosphatase domain. A red horizontal bar represents the substrate-binding region. Skipped exon 16 in family A is indicated within box together with their evolutionary conservation, which includes *F. rubripes*. A blue horizontal



**Table S1.** Primer Sequences

| Forward primer (5'→3')                 | Reverse primer (5'→3')              | Product size (bp) |
|----------------------------------------|-------------------------------------|-------------------|
| GL_Ex1F<br>ggcacgttcttgaggac           | GL_Ex1R ggaaaaggggtggaggag          | 298               |
| GL_Ex2F gcataactttattgccaattatctg      | GL_Ex2R gggaagaaacaggggaaca         | 397               |
| GL_Ex3F<br>atcggcctttctctctc           | GL_Ex3R gagaacatcatttgggaaaagc      | 289               |
| GL_Ex4F tgcccataacagtagtgaagg          | GL_Ex4R<br>Tttcttgcctctggatcagaat   | 383               |
| GL_Ex5F<br>tctgctgtgtacctgactcatt      | GL_Ex5R<br>Tttcaattccccttctcttg     | 592               |
| GL_Ex6F<br>tctatacccagggcctttcc        | GL_Ex6R<br>Cccaccagtccattgtct       | 285               |
| GL_Ex7F<br>gaccgcaatctttcttga          | GL_Ex7R<br>Gcattgccctgtaagggtgt     | 388               |
| GL_Ex8F<br>ccagcctctgtgaacattctg       | GL_Ex8R<br>Acccctcctcaataccta       | 247               |
| GL_Ex9F cattgctaagacattccttctaact      | GL_Ex9R cctgttccataggaagactg        | 298               |
| GL_Ex10F<br>gaaacacaaaaagacaatataaagga | GL_Ex10R<br>tgctctccttgggaactg      | 280               |
| GL_Ex11F<br>ggattcatgctctgctggt        | GL_Ex11R tgcttagtggtttcaatagtca     | 300               |
| GL_Ex12F<br>ttgggtggtgcaactgat         | GL_Ex12R gctgaatcgaatgatgcaaa       | 246               |
| GL_Ex13F<br>gaaaacagaagtgtctgaaaagag   | GL_Ex13R tttgccagataattagcctta      | 446               |
| GL_Ex14F<br>aattggtcagatggggaatg       | GL_Ex14R<br>Cttgggatttctggtggaa     | 396               |
| GL_Ex15F gcccttaagactagatgaaaagca      | GL_Ex15R caacttaggtgtgcaaaaaca      | 298               |
| GL_Ex16F gctttgcaagcagtaacctg          | GL_Ex16R ctttgagcacacacagcat        | 174               |
| GL_Ex17F<br>ttgcaacttttcatctttccat     | GL_Ex17R tccttttgttacttcttgaagc     | 201               |
| GL_Ex18F<br>acctgatgtaattatgaaagctgtc  | GL_Ex18R<br>Aagcgtcccttctcttga      | 228               |
| GL_Ex19F<br>tttccaagaagattaagaagtatga  | GL_Ex19R caggcccttccattacaga        | 227               |
| GL_Ex20F<br>gggcttgtagcaataaacc        | GL_Ex20R gcaatgacagtcctcaacc        | 236               |
| GL_Ex21F ttgatagaaaggccaaaa            | GL_Ex21R<br>Gttagcttgggatgcctga     | 189               |
| GL_Ex22F<br>ataggcgtgaagcagcattt       | GL_Ex22R<br>Ggcaggttttgcctgaagt     | 249               |
| GL_Ex23F<br>tccttctagcctgtttgtt        | GL_Ex23R tcagcaggtgcagcatagg        | 223               |
| GL_Ex24F gcatgcttaactagcagagctc        | GL_Ex24R tccccttacaacaaactcc        | 293               |
| GL_Ex25F gcaacagagcaagactccatc         | GL_Ex25R<br>gaataatgtaagttttcagtcca | 300               |
| GL_Ex26F<br>ttgacatgtctgctctgaa        | GL_Ex26R<br>TCCATCACATCCCCCTCTAA    | 229               |
| D12S1303F<br>cctcagccagaaagactga       | D12S1303R<br>Cttcagttatggccatgcaa   | 376-392           |
| GL_cDNA1F<br>CCAGTTCGCCATTGTGAG        | GL_cDNA1R<br>TGCCTCAGATACCAGCTGAA   | 670               |
| GL_cDNA2F<br>AAAGACTTCCGGACAATGCTA     | GL_cDNA2R<br>CCAGGTTCCCTTCAGTTCTGC  | 695               |
| GL_cDNA3F<br>CCACTGCTTTTGTGATGGGTTC    | GL_cDNA3R<br>AGGTCTGGTCCAGCTCAGAA   | 596               |
| GL_cDNA4F<br>TTGGACCACCTTCAGATCCT      | GL_cDNA4R<br>GCAGTCATGACATTGCGTGT   | 517               |

|                         |                       |     |
|-------------------------|-----------------------|-----|
| GL_cDNA5F               | GL_cDNA5R             | 579 |
| GGTGGTTGCAGAAGGAAAAA    | TTGACAAATGTACCAGCTCCA |     |
| GL_cDNA6F               | GL_cDNA6R             | 482 |
| TGGTAGTGATCTCCGTGCTG    | TCTCACACGGCTGAAGTCAT  |     |
| GL_cDNA7F               | GL_cDNA7R             | 382 |
| CCGTTACACAAACATCCTACCA  | CATCACATCCTGCATCTCGT  |     |
| GL_cDNA8F               | GL_cDNA8R             | 488 |
| ACGACTGGGCCTGTAGACAC    | ATCTGGAAGCAAGGGAGGAT  |     |
| hBactin-F               | hBactin-R             | 164 |
| CGCAAAGACCTGTACGCCAAC   | GAGCCGCCGATCCACACG    |     |
| qWT_F_                  | qWT_R                 | 202 |
| ACTGACAAACCCGGTTCA A    | TCTCACACGGCTGAAGTCAT  |     |
| qM_F                    | qM_R                  | 120 |
| ACT GAC AAA GAG TTG AAA | TCTCACACGGCTGAAGTCAT  |     |
| TTG                     |                       |     |

*PTPRO* exon-flanking primers, as shown by GL abbreviation, D12S1303 microsatellite primers, cDNA primers, and qRT-PCR primers. hBactin indicates the beta actin housekeeping gene. qWT indicates qRT-PCR primers for amplifying wild-type allele. qM indicates qRT-PCR primers for amplifying mutant allele.
